## **Phytochrome gene expression studies: PHYE is required for FR-induced expression of PHYA and PHYD suppresses expression of PHYA**

**Umidjon Shapulatov<sup>1,3</sup>, Mara Meisenburg<sup>1</sup>, Mark van Hoogdalem<sup>1,4</sup>, Alexander van Hall<sup>1</sup>, Wim van Ieperen<sup>2</sup>, Maarten van Wassenaar<sup>2</sup> and Alexander van der Krol<sup>1,\*</sup>**

<sup>1</sup>Laboratory of Plant Physiology, Wageningen University & Research, Droevendaalsesteeg 1, 6708 PB Wageningen, The Netherlands; <sup>2</sup>Horticulture and Product Physiology, Department of Plant Sciences, Wageningen University and Research, Droevendaalsesteeg 1, 6708 PB Wageningen, The Netherlands; <sup>3</sup>Faculty of Biology, National University of Uzbekistan, University street 4, 100174 Tashkent, Uzbekistan; <sup>4</sup>Business Unit Greenhouse Horticulture, Wageningen University & Research, Droevendaalsesteeg 1, 6708PB Wageningen, The Netherlands

\*Correspondence: [Sander.vanderKrol@wur.nl](mailto:Sander.vanderKrol@wur.nl)

## Abstract

Arabidopsis has five phytochrome (PHY) genes for sensing the Red:Far Red (R:FR) ratio in ambient light, of which PHYA has an established role in responses to FR. To study whether and how PHYs may influence each other's transcription, PHY-Luciferase reporter plants (pPHYA:LUC, pPHYB:LUC, pPHYC:LUC, pPHYD:LUC and pPHYE:LUC) were constructed. Subsequently, reporter lines representative for each PHY were crossed into each of the five single *phy*-mutant backgrounds. Reporter activities in WT and *phy* mutant was studied under diurnal mixed (R, B, FR), R, FR or B LED light in seedling or rosette plants. Both pPHYA:LUC and pPHYB:LUC show strong induction under FR. Full FR upregulation of both PHYA and PHYB is dependent on PHYE, identifying PHYE as a novel sensor for FR light responses. Results also show that PHYA expression is strongly suppressed by PHYD. Results were confirmed for expression of endogenous PHYA and PHYB, albeit with different dynamics compared to the LUC reporters. Profiling of pPHYA:LUC and pPHYB:LUC reporters suggest gating of FR responses. Manipulation of PHY expression levels by FR may provide a novel basis for manipulating plant growth in controlled environments.

**Key words:** PHYTOCHROME, LED, Luciferase reporter plants, transcription



## 1 Introduction

2 The most important photoreceptors that control plant growth as function of the Red (R) and Far-Red (FR) light  
3 spectrum are a family of phytochrome (PHY) genes, which in Arabidopsis consist of PHYA-PHYE (Bae and Choi 2008).  
4 Phytochromes are produced in the inactive red (R) light absorbing Pr form. Upon perception of red light the inactive Pr  
5 state of phytochromes changes to the active Pfr state to trigger responses in both the cytosol (Paik, Yang et al. 2012)  
6 and in the nucleus (Nagy and Schafer 2002, Nagatani 2004, Kevei, Schafer et al. 2007, Van Buskirk, Decker et al. 2012,  
7 Klose, Viczian et al. 2015). In the nucleus phytochrome protein interacts with multiple Phytochrome Interacting  
8 Factors (PIFs) to mediate light transcriptional responses (Huq, Al-Sady et al. 2004, Castillon, Shen et al. 2007, Leivar  
9 and Quail 2011). While phytochromes are activators, Phytochrome Interacting Factors (PIFs) are considered repressors  
10 of photomorphogenesis, because the interaction of phytochrome Pfr with PIFs promotes their turnover (Park, Park et  
11 al. 2012, Xu, Paik et al. 2015). The interaction between phytochromes and PIFs do not only result in degradation of the  
12 PIFs, but also in co-degradation of the phytochrome protein. Indeed, the function of Pfr in the nucleus is controlled by  
13 multiple nuclear factors that are involved in nuclear Pfr stability (Monte, Tepperman et al. 2004, Khanna, Shen et al.  
14 2007, Al-Sady, Kikis et al. 2008, Leivar, Monte et al. 2008, Leivar and Quail 2011, Ni, Xu et al. 2013). It has been shown  
15 that PIFs regulate phyB-E protein stability through COP1/DET/FUS (Jang, Henriques et al. 2010). In addition, PIFs and  
16 PHYs interact with a CUL3-based E3 ubiquitin ligases complex containing the Bric-a-Brac/Tramtrack/Broad Complex  
17 (BTB)-domain containing substrate adaptor Light-Response (LRB). Presumably PIFs and PHY are co-degraded by  
18 interaction between a CUL3-LRB-PIF complex and a CUL3-LRB-PHY complex, through dimerization of the LRBs  
19 (Christians, Gingerich et al. 2012). Translocation of PHY proteins into nucleus is required for the nuclear signaling and  
20 the translocation of PHYA Pfr protein into the nucleus is controlled by the FAR-RED ELONGATED HYPOCOTYL 1 (FHY1)  
21 AND FHY1-LIKE (FHL) (Genoud, Schweizer et al. 2008). PHYs also have a function in the cytosol where they control  
22 translation of specific mRNAs (Paik, Yang et al. 2012). The stability of the pool of cytosolic Pfr is regulated by cytosolic  
23 factors, explaining why the dynamics of nuclear PIF protein turnover and total PHY protein turnover may not be the  
24 same.

25 Transcription of PHY genes and translation of the PHY mRNAs determine the actual pool of phytochrome protein that  
26 is available for PHY protein signaling. Understanding transcriptional regulation of phytochrome genes is therefore  
27 integral part of understanding overall phytochrome action. Phytochrome genes are regulated by the circadian clock  
28 (Toth, Kevei et al. 2001), while in turn the clock is entrained through phytochrome signaling (Somers, Devlin et al.  
29 1998). Genetic interactions between phytochromes affect germination, hypocotyl elongation and flowering, but this  
30 was not correlated to possible effects on PHY gene transcription (Sanchez-Lamas, Lorenzo et al. 2016). Recently it was  
31 shown that the promoter of PHYA is targeted by PIF4 and PIF5 (Seaton, Toledo-Ortiz et al. 2018), which potentially  
32 couples PHYA transcription to R:FR light conditions, as R:FR conditions determine the interaction between PHYB and  
33 PIF4/5 and the stability of these proteins (Lorrain, Allen et al. 2008, Foreman, Johansson et al. 2011).

34 In the studies on phytochrome action the effects of a given light treatment on PHY promoter activities are usually  
35 ignored. However, whether this is always justified under day light conditions or under artificial LED light with its  
36 unnatural spectral composition of LED lights requires verification. Indeed, there is no comprehensive and systematic  
37 analysis of PHY gene transcription as function of (LED) light quality. Therefore, we investigated PHY promoter activity

38 as function of different LED light conditions at different developmental stages and as function of individual  
39 phytochromes. Dynamic transcriptional responses *in planta* was monitored using firefly luciferase (LUC) reporter lines  
40 (Millar, Short et al. 1992). The pPHYA:LUC, pPHYB:LUC, pPHYC:LUC, pPHYD:LUC and pPHYE:LUC reporter lines were  
41 crossed into each of the single phytochrome mutant backgrounds, resulting in a total of 30 reporter lines. Results  
42 show that interactions between phytochromes at the transcription level change from seedling to mature rosette  
43 stage. The diurnal pPHY:LUC activity was monitored in response to day-time R, FR or B LED light, showing strong  
44 upregulation of pPHYA-LUC and pPHYB-LUC activity under FR. Moreover, this induction by FR was not dependent on  
45 the classical FR light sensor PHYA. Full FR-induction of PHYA and PHYB under FR depends on PHYE, thus identifying  
46 PHYE as novel sensor for FR. Similarly, PHYE affected expression of endogenous PHYA and PHYB under FR. The studies  
47 thus show unexpected complex PHY-interaction in the regulation of PHY gene expression.

48

## 49 **Materials and methods**

### 50 *Plant materials and growth conditions.*

51 Seeds of *Arabidopsis thaliana* T-DNA insertional mutant lines were obtained from the Nottingham Arabidopsis Stock  
52 Centre (NASC, University of Nottingham, UK). The following lines were used in our work: WT (Col-0), *phyA-T* (NASC:  
53 N661576), *phyB-9* (Reed, Nagpal et al. 1993), *phyC-2* (N66036), *phyD* (N676270), *phyE-T* (N671700). All phytochrome  
54 mutants are in Col-0 background. The *phy* T-DNA insertion mutants were validated as homozygous insertion mutant  
55 by PCR of genomic DNA using Salk T-DNA and gene specific primers (Table S1). For Luminator (van Hoogdaem,  
56 Shapulatov et al. 2021) experiments, seeds were sown on MS-0.8% agar plates (Murashige-Skoog medium 0.22g/L,  
57 8g/L plant agar Duchefa), stratified in the dark for three days at 5°C, after which they were sown on 4x4x4cm  
58 rockwool blocks (Grodan, Roermond, The Netherlands) soaked in Hyponex nutrient solution (Unifarm, Wageningen,  
59 The Netherlands). Plants were pre-grown in a climate chamber (12hL/12hD; 22°C; relative humidity (RH) at 65%).  
60 Directly before transfer to LUMINATOR, reporter plants were watered by soaking the rockwool blocks in Hyponex  
61 solution, which allows for growth for up to 6 days without additional watering. Light conditions in LUMINATOR cabinet  
62 are described below.

63

### 64 *PHY-LUC reporter cloning and construction homozygous reporter lines*

65 Construction of the pPHY:LUC reporter genes using ~2kb upstream promoter fragments of either PHYA, B, C, D or  
66 PHYE is described in (Toth, Kevei et al. 2001). Binary vectors containing these reporter genes were kindly donated by  
67 the group of Prof. Nagy.

68 *Arabidopsis* Col-0 plants were transformed by floral dip transformation (Zhang, Henriques et al. 2006) and positive  
69 transformants were selected based on Luc activity. Representative homozygous lines were crossed into the different  
70 phytochrome mutant backgrounds. For all progeny homozygous for the pPHY:LUC reporter, the homozygous *phy*-

71 mutant genotype was confirmed by PCR and T<sub>4</sub> plant homozygous for both the phytochrome mutation and the  
72 respective pPHY:LUC reporter were used.

73

#### 74 *In planta LUC reporter activity measurements in LUMINATOR*

75 LUC activity in the different pPHY:LUC reporter plants was measured in a custom built LUMINATOR cabinet containing  
76 a high performance PIXIS: 1024 CCD camera (Princeton Instruments, Roper technologies, Sarasote, FL, USA) fitted with  
77 a 35mm f/1.4 Nikkor SLR lens (Nikon, Shinjuku, Tokyo, Japan). Plants were pre-sprayed with 1mM D-luciferin  
78 (Promega, Fitchburg, WI, USA) one day before imaging to deplete accumulated LUC (de Ruijter, Verhees et al. 2003).  
79 For multiple day measurements plants were sprayed daily with 1 mM D-luciferin (Promega, Fitchburg, WI, USA) at 10  
80 am. Plants were acclimated to conditions in LUMINATOR for one day. LUC activity images were taken every 30  
81 minutes with an exposure time of 7 minutes, during which LED illumination is switched off. Light from chlorophyll  
82 fluorescence of plants was blocked by using a ZBPB074 Bandpass Filter (Asahi Spectra, Sumida, Tokyo, Japan).

83

#### 84 *Light conditions during diurnal LUC activity imaging*

85 Imaging of ff-LUC activity in plants is under mixed LEDs, emitting R (590-660nm), B (420-500nm) and FR 680-760). In  
86 addition, a ramping in R intensity and R:FR ratio was used to mimic natural morning and evening light light conditions.  
87 The light intensity during 2 hours ramping at start-day and end-day is 33  $\mu\text{mole m}^{-2} \text{s}^{-1}$  and during the remaining hours  
88 of the photoperiod 90  $\mu\text{mole m}^{-2} \text{s}^{-1}$ . Photosynthetically active radiation (PAR) intensity was 25 and 80  $\mu\text{mole m}^{-2} \text{s}^{-1}$   
89 respectively. The ratio B:R:FR light during ramping is 1:2:1 and during the remaining hours of the photoperiod 3:6:1.

90 The Red light treatments were at 80  $\mu\text{mole m}^{-2} \text{s}^{-1}$  of pure Red light, the FR light treatment was at 430  $\mu\text{mole m}^{-2} \text{s}^{-1}$  of  
91 FR LED light and the Blue light treatment was at 30  $\mu\text{mole m}^{-2} \text{s}^{-1}$  of blue light. The R>FR step gradient light treatment  
92 consists of 3 hours R:FR=8, 3 hours R:FR=1 (mild shade), 3 hours R:FR=0.5(shade) and 3 hours R:FR=0.2 (deep shade).  
93 PAR intensity was 80-85  $\mu\text{mole m}^{-2} \text{s}^{-1}$  during all shade conditions. Light quality/intensity was measured the using  
94 Flame-T spectroradiometer (Ocean Optics, Duiven, The Netherlands). Relative luminescence was quantified in Image J  
95 ([imagej.nih.gov/ij](http://imagej.nih.gov/ij)) as described before (Shapulatov, van Hoogdalem et al. 2018, van Hoogdalem, Shapulatov et al.  
96 2021).

97

#### 98 *Quantitative RT-PCR.*

99 Total RNA was isolated from 3 weeks old rosettes that placed under mixed LED for 1 day for acclimatization and the  
100 next the day, plants were exposed to far-red light (430  $\mu\text{mol /m}^2\text{s}$ ). rosettes were harvested at the indicated times.  
101 mRNA and cDNA synthesis were as described (van Hoogdalem, Shapulatov et al. 2021). qRT-PCR for quantification of  
102 endogenous PHY genes on a CFX Connect Real-time system machine (BioRad, CA, USA). Primer sequences used can be

103 found in Table S1. Statistical analysis of the qPCR data was carried out in RStudio (3.6.0). A 2-way ANOVA was used to  
104 analyse the qPCR data followed by a Least Significant Different (LSD) post-hoc test (agricolae 1.3-5, R package). The  
105 datasets for the PHYA and PHYB activity were first log transformed to meet the assumptions of the 2-way ANOVA.

106

107

108

## 109 **Results**

### 110 *Construction of thirty pPHY:LUC reporter lines*

111 In order to study the expression of the five phytochrome genes (PHYs) of Arabidopsis in WT and phytochrome mutant  
112 backgrounds, the upstream 2-2.5 kb promoter of each of the five PHY genes was fused to the firefly luciferase (LUC)  
113 coding sequence in binary expression vectors (Toth, Kevei et al. 2001), resulting in five pPHY:LUC reporter constructs.  
114 The different pPHY:LUC reporter constructs were introduced into Arabidopsis WT (Col-0) by the agrobacterium  
115 mediated floral dip transformation (Zhang, Henriques et al. 2006). For each of the pPHY:LUC reporters a minimum of  
116 ten primary transformants were screened for luciferase activity and one representative transformed plant was  
117 selected and developed into a homozygous reporter line expressing either pPHYA:LUC, pPHYB:LUC, pPHYC:LUC,  
118 pPHYD:LUC or pPHYE:LUC. Subsequently, each of the five homozygous pPHY:LUC reporter plants was crossed to each  
119 of five single *phy*-mutant plants. Phytochrome mutant backgrounds were selected based on seedling growth  
120 phenotype under specific light conditions and PCR analysis of genomic DNA using specific primers (Table S1)  
121 (Nagatani, Reed et al. 1993, Hennig, Funk et al. 1999, Balasubramanian, Sureshkumar et al. 2006, Chen, Sonobe et al.  
122 2013). By crossing the pPHY:LUC reporter into the different *phy*-mutant backgrounds, the relative expression of the  
123 LUC reporter in WT and mutant can be compared directly, since the reporter is in same chromosomal location with  
124 identical 'position' effects on transgene expression. The pPHY:LUC reporter lines and constructs are listed in Table S2.  
125 Fig. 1 shows representative images of the pPHY:LUC reporter activity in WT in three week old rosette plants. The  
126 relative level of LUC activity is not the same for the different PHY reporters. At the rosette stage the PHYA and PHYC  
127 promoters show the strongest transcriptional activity, while transcription from the PHYE promoter is very weak.

128

### 129 *PHY mediated genetic interactions on PHY-LUC activity diminish during plant maturation*

130 pPHY:LUC activity in WT and *phy* mutants was imaged in 7 and 14 day old seedlings and 24-26 day old plants. For all  
131 three developmental stages the LUC activity imaging was at 11 am, close to the maximum phase of pPHY:LUC  
132 reporters in seedlings (Toth, Kevei et al. 2001). The average relative LUC activity per seedling/plant was quantified for  
133 each of the reporter lines (Fig. 2). The results indicate that especially in 7-day-old seedlings for many pPHY-LUC  
134 reporters the activity is significantly increased in a *phy*-mutant background, indicating that at early stages of  
135 development different phytochromes are involved in repression of transcription of the pPHY-LUC reporters (Fig. 2A-E).  
136 However, as plants mature, this genetic interaction between phytochromes at the transcription level diminishes (Fig.  
137 2A-E). Most remarkable is the consistent elevated level of pPHYA-LUC expression in the *phyD* mutant background,  
138 indicating that PHYD is a constitutive suppressor of pPHYA-LUC transcription. As plant mature the genetic interactions  
139 between the different phytochromes diminishes, but is still apparent for the suppression by PHYB on pPHYA-LUC, the  
140 suppression by PHYB, PHYC, PHYD and PHYE on pPHYB-LUC and suppression by PHYA, PHYB and PHYC on pPHYD-LUC  
141 (Fig. 2, 24 day old plants). In contrast, full expression of pPHYC-LUC in mature plants requires PHYB (Fig. 2C, 14 and 24  
142 day old plants).

143



144 *pPHY-LUC responses to R, B and FR light*

145 To determine the pPHY:LUC activity in WT under different light conditions, plants were imaged in Luminator (van  
146 Hoogdalem, Shapulatov et al. 2021) for four days. After one day acclimation, LUC activity was imaged in plants under  
147 12hrR/12D, followed by 12hrFR/12D and finally 12hrB/12D, using either R, B or FR LED light during the day. The  
148 pPHY:LUC activity images were obtained every 30 minutes. This was done for 7-day old plants, 14-days old plants and  
149 when plants were 25-day old. Qualitatively the responses of the different pPHY:LUC reporters are similar at these  
150 three stages of development and results of the expression profiles in 14 day old plants are shown in Figure 3. Most  
151 pPHY:LUC reporters do not show a strong response to the R photoperiod, except for pPHYC:LUC which is induced  
152 under R. Also, pPHYC:LUC shows a consistent transient increase in activity at the day-night transition following all  
153 photoperiods (Fig. 3). Most remarkable is the strong and immediate upregulation of pPHYB:LUC under FR light  
154 following the dark period of the night, reaching a peak expression almost 10-fold higher than under R light. During the  
155 night following FR, both expression of pPHYB:LUC and pPHYA:LUC show an initial rapid decline. Expression of  
156 pPHYA:LUC is also upregulated by FR light but in a more gradual way, reaching a 6-fold higher expression at the end of  
157 the FR photoperiod compared to under R. Moreover, only pPHYC:LUC shows a transient increase in activity at the day-  
158 night transition following all photoperiods. The other pPHY:LUC reporters were not induced by FR, or showed a  
159 decline of expression under FR. Only pPHYB-LUC and pPHYC-LUC show a strong response to B during the day (Fig. 3).  
160 Overall, results show that light quality may change the expression level of some of the phytochrome genes and thus  
161 light quality changes the potential pool of phytochrome protein that may participate in light signaling. Note that some  
162 of the fine structure in the LUC activity profiles during the day is most likely due to renewed spraying of luciferin and  
163 some leaf hyponastic movement.

164

165 *Feedback regulation on pPHYB-LUC by PHYB and PHYE under FR and B*

166 Because phytochromes are involved in R:FR sensing, the strong induction of pPHYB:LUC in WT plants under FR light  
167 suggests the involvement of PHYA, which is the classical sensor for FR light responses (Whitelam, Johnson et al. 1993,  
168 Yanovsky, Casal et al. 1997, Fankhauser 2001). To determine the role of individual phytochromes in expression of  
169 pPHYB:LUC under different light conditions (R/FR/B, R, FR or B LED light), the pPHYB:LUC activity was monitored in the  
170 different phytochrome mutant backgrounds (Fig. S1). As example, here we show results for pPHYB:LUC in WT and  
171 different phytochrome mutants under FR and B (Figure 4). The induction of pPHYB:LUC under FR is significantly  
172 reduced in the *phyB* and the *phyE* mutant background, indicating that in context of transcriptional regulation of  
173 pPHYB:LUC expression the PHYB and PHYE act as a FR sensor. In contrast, the classical FR sensor PHYA has little effect  
174 on pPHYB:LUC activity under FR (Fig. 4). Most phytochromes do not affect the response of pPHYB:LUC to B, except for  
175 PHYC, which represses pPHYB:LUC activity in WT (Fig. 4).

176 The diurnal pattern of PHYB promoter activity under the different light regimes indicate that the phase of pPHYB:LUC  
177 activity is dependent on the light conditions (phase of pPHYB:LUC in WT under mixed LED ZT=3 hr, under R ZT=4 hr,  
178 under FR ZT= 6 hr; Fig. S1). In addition, the phase is dependent on the phytochrome mutant background (phase of

179 pPHYB:LUC under B in WT ZT=3 hr, in *phyB* mutant ZT=7 hr, in *phyC* ZT= 2 hr; Fig. 4). Expression of pPHYB:LUC in the  
180 *phyB* mutant background under mixed or R light is increased compared to in WT, but decreased under FR and B LED  
181 light compared to in WT (Fig. S1). This indicates that the effect of PHYB on its own promoter activity is dependent on  
182 light conditions and may switch from a repressor interaction (under mixed and R light) to activator interaction (under  
183 FR and B) (Fig. S1 and Fig. 4).

184

185 *pPHY-LUC response to "shade" depends on time of the day*

186 To investigate the phytochrome gene expression as function of shade light conditions, pPHY:LUC reporter activity was  
187 imaged in 25-day old WT rosette plants placed under varying ratio's of R:FR light. The five sets of WT pPHY:LUC  
188 reporter plants were placed in LUMINATOR to adapt for two days to diurnal mixed LED light (R,B,FR). After the night of  
189 the second day, the photoperiod was started using 3 hours of R light combined with low level of FR (R:FR=8).  
190 Subsequently, every 3 hours the R level remained the same, but dosage of FR was increased going from R:FR=8 to  
191 R:FR=1, to R:FR=0.5 and finally ending the day with 3 hours of R:FR=0.2, which mimics deep shade conditions. After  
192 the night following these 4 blocks of increasing shade light conditions, the next day, the same blocks of R+FR LED light  
193 were given in reverse order, starting the day with R:FR=0.2 and ending the day with R:FR=8. The different pPHY:LUC  
194 reporters show different responses to the shade treatments (Fig. 5). Both pPHYA:LUC and pPHYB:LUC show little  
195 response to the day under mixed R,FR,B LED and no response to 3 hr R:FR=8 (Fig. 5). Under R:FR=1 pPHYB:LUC shows  
196 an direct transcriptional response, while for pPHYA:LUC and pPHYC:LUC a transcriptional response only starts near the  
197 end of three hour R:FR=1 (Fig. 5). In contrast pPHYD:LUC expression is down regulated during this light treatment. This  
198 is consistent with our discovery that PHYD is a suppressor of PHYA (Fig. 2) and suggests that part of the upregulation  
199 of PHYA may be caused by downregulation of PHYD under increasing shade conditions. However, the following day  
200 when light treatments are given in reverse order, pPHYD:LUC activity shows an increase at the end of 3hr R:FR=0.2,  
201 which is not mirrored by a decline in pPHYA:LUC activity (Fig. 5). During the night, expression of PHYA, PHYB and PHYC  
202 initially decline with different rates, which is less rapid than the decline in pPHY:LUC expression after pure FR (Fig. 3).  
203 Also, after pure FR expression declines to "normal" levels as seen under WL, mixed LED or B (Fig. 3), while after the  
204 R+FR light treatments the expression of pPHYA:LUC and pPHYB:LUC remains high throughout the night (Fig. 5).

205 When light treatment goes from deep shade to mild shade, only pPHYB:LUC shows a direct upregulation under  
206 R:FR=0,2, levels off at R:FR=0,5 and subsequently decreases under R:FR=1 and 8. While pPHYA:LUC shows the  
207 strongest response to R:FR=0,2 at end of day, when this shade condition is given at the start of the day pPHYA:LUC  
208 shows no response and only increases in activity at R:FR=0,5 or higher (Fig. 5). In general pPHYC:LUC decreases when  
209 R:FR increases, while in general pPHYD:LUC shows the opposite response and shows decrease in activity when R:FR  
210 increases. Overall, the results indicated changes in pPHY:LUC activity as function of shade, but dependent on time of  
211 day shade conditions are given. Subsequently the role of individual phytochromes is in the shade response of the  
212 different pPHY:LUC reporters was determined.

213

214 *PHYE is required for pPHYA:LUC response to different levels of FR added to R*

215 To determine the role of each of the five phytochromes in the response to different R:FR ratios, pPHY:LUC reporter  
216 activities were quantified in all phytochrome mutant backgrounds (Fig. S2A-E). Here only the big effects on PHYA and  
217 PHYB expression are discussed. Expression of pPHYA:LUC is mostly affected by PHYD and PHYE: expression of  
218 pPHYA:LUC is much increased in the *phyD* mutant, while the upregulation of pPHYA:LUC under increasing FR is absent  
219 in the *phyE* mutant background (Fig. 6). This confirms a specific role for PHYE in FR light sensing in the regulation of  
220 PHYA gene expression. In contrast, the classical sensor for FR responses PHYA had only a small effect on FR-induction  
221 of PHYA-LUC (Fig. S2). The pPHYB:LUC activity is mostly affected by PHYB itself (Fig. S2B). The effect of PHYC, PHYD  
222 and PHYE on PHYB expression is conditional: they have little effect on pPHYB:LUC activity when going from high R:FR  
223 to low R:FR, but these phytochromes act as suppressor of pPHYB:LUC expression when light changes from low R:FR to  
224 high R:FR (Fig. S2B).

225 Results for the PHY:LUC reporters reflect the activity of endogenous transcription factors on the inserted transgenes.  
226 To determine if the reporter activity also reflect activity of the endogenous PHY genes some of the strong effects of  
227 PHYD and PHYE on expression of PHYA, strong effect of PHYE on expression of PHYB were validated by qPCR. Results  
228 shows a different dynamics of induction of endogenous PHYA under FR, indicating that the normal context of the  
229 PHYA gene is far more buffered against effects of FR than the pPHYA:LUC reporter. However, endogenous PHYA is  
230 induced after 10 hr of FR and this induction is absent in the *phyE* mutant, confirming the interaction as shown for the  
231 pPHYA:LUC reporter. Moreover, also the strong suppression by PHYD of PHYA expression is confirmed for the  
232 endogenous PHYA gene (Fig. 7A). The endogenous PHYB gene shows rapidly upregulation under FR and this  
233 upregulation is reduced in the *phyE* mutant for the early response peak, confirming a role for PHYE in FR responses for  
234 PHYB expression (Fig. 7B).

235

## 236 **Discussion**

237 *Mutual transcriptional regulation also at the basis of complex interaction between PHYs*

238 The role of the different phytochrome gene family members of the Arabidopsis has mostly been studied for  
239 germination, hypocotyl elongation and flowering responses and these phenotypes have also been used to dissect the  
240 complex genetic interactions between the different Arabidopsis phytochrome genes (Sanchez-Lamas, Lorenzo et al.  
241 2016). Here we have revealed a potential basis of these complex interactions by revealing that phytochrome genes  
242 influence each other's transcription. The interactions are complex because they may depend on given light conditions.  
243 For instance, the activity of PHYB on its own expression reverses depending on the light conditions: under mixed light  
244 and R LED PHYB suppresses its own expression, while under FR PHYB is required for the full induction response (Fig. 5).  
245 This light dependent activity is also visible in the experiment with different R:FR light treatments, which shows that  
246 PHYB strongly suppresses its own gene expression under mixed LED light, but is required for the response to R plus  
247 added FR light (Fig. S2B).

248 The transcriptional factors that act on the pPHY:LUC reporters show a strong response in some of the single  
249 phytochrome mutants (Figs. 2, 4, 5). However, validation of the pPHYA:LUC and pPHYB:LUC reporter responses also  
250 indicates that endogenous PHYA and PHYB gene expression may be more buffered against the effect of single  
251 phytochrome mutation (Fig. 7). Nevertheless, major effects revealed by the pPHY:LUC reporters were validated for  
252 endogenous PHYA and PHYB (Fig. 7): PHYE is required for full FR induced transcription of PHYA and PHYB and PHYD  
253 represses PHYA transcription.

254

#### 255 *PHYD is a constitutive suppressor of PHYA gene transcription*

256 One of the strongest and consistent interactions these studies have uncovered is the suppression of PHYA  
257 transcription by PHYD at different stages of development and under different light conditions (Figs 2,6,7). Assuming  
258 that this interaction is cell specific, this implies that PHYD is expressed in most cells that express PHYA. The biological  
259 function of this suppression of PHYA by PHYD is at present not clear. Our results are consistent with the  
260 complementary expression profiles of PHYA and PHYD in developing and dry seeds (low PHYA, high PHYD), and  
261 imbibed seeds (high PHYA and low PHYD) (Toufighi, Brady et al. 2005). The function of PHYD thus could be to limit  
262 PHYA expression in developing seeds. PHYD can form a homodimer and heterodimers with PHYB, PHYC and PHYE  
263 (Sharrock and Clack 2004). None of the mutants of *phyB*, *phyC* or *phyE* show a strong effect on pPHYA:LUC expression  
264 (Fig. 2), suggesting that it may be the combined loss of PHYD homodimers and heterodimers that are responsible for  
265 the strong upregulation of PHYA expression in the *phyD* mutant. Future analysis will have to show how PHYA  
266 expression is affected in double and triple PHY mutants. The higher expression level of PHYA in the *phyD* mutant  
267 background may relate to the different phenotypes that have been described for the Arabidopsis *phyD* mutant  
268 (Christians, Gingerich et al. 2012, Sanchez-Lamas, Lorenzo et al. 2016).

269

#### 270 *Gating of the FR-induced PHY transcriptional response*

271 The strong induction of both PHYA and PHYB is not only an artifact of the unnatural pure FR light condition (Figs 3 and  
272 4), but is also seen at more physiological levels of R:FR (Figs S4, 5 and 6). The responses to different ratios of R:FR are  
273 dependent on time of day at which they are given, with the strongest response near end of day and the strongest  
274 suppression of a FR-induced transcriptional response at the start of the day. Overall, this suggests a gating of the FR  
275 transcriptional response of PHYA and PHYB by the circadian clock and this gating coincides in gating of the rapid FR  
276 elongation response observed in seedlings (Salter, Franklin et al. 2003). Expression of phytochrome genes in seedlings  
277 is strongly regulated by the clock (Toth, Kevei et al. 2001). However, the amplitude in PHY expression by clock  
278 regulation seems to be very much reduced in mature rosetted plants (Figs 3 and 5). The reciprocal interaction  
279 between PHYs and the clock on PHY gene transcription, combined with the interactions between different PHYs on  
280 PHY gene transcription as function of light condition, may explain the different phases for the FR light responses for  
281 PHYA and PHYB.

282

283 *Potential consequences for the total phytochrome protein pool and heterodimer formation*

284 Phytochrome activity under different light conditions has mainly been studied for signalling downstream of PHY<sup>Pfr</sup>,  
285 which is both a function of the total phytochrome protein pool and the equilibrium between active PHY<sup>Pfr</sup> and inactive  
286 PHY<sup>Pr</sup>. Although it is well established that the fraction of activated PHY protein is determined by R:FR ratio, here we  
287 have shown that under specific light conditions also the input of PHY protein may change. The increased transcription  
288 of PHYA and PHYB in response to FR may increase the total PHYA and PHYB protein pool. Potentially, this may  
289 compensate a little for the shift in the equilibrium between PHY<sup>Pfr</sup> and PHY<sup>Pr</sup> under FR towards inactive PHY<sup>Pr</sup>. In  
290 addition, an increased PHYA and PHYB protein pool in response to FR increases the potential for light signaling when  
291 conditions favour activation of PHY protein again. This could have potential applications in manipulating PHY action in  
292 greenhouses to steer crop performances.

293 Phytochrome interactions studies have revealed that PHYC may form heterodimer with PHYB and PHYD and that PHYC  
294 may not exist as homodimer (Clack, Shokry et al. 2009). The relative high expression of PHYC compared to that of  
295 PHYB, PHYD and especially PHYE (which is expressed at very low levels), suggest that PHYB and PHYD may  
296 preferentially exist as heterodimer with PHYC and that PHYB/D and PHYB/E heterodimers are only formed as minor  
297 components. Removal of PHYC from this pool of interacting phytochromes could therefore result in a substantial  
298 increase in the pool of PHYB/D and PHYB/E heterodimers. The induction of PHYB expression under FR is strongly  
299 affected by PHYB and PHYE, but not PHYC or PHYD. This could suggest that the induction of PHYB expression under FR  
300 may be mostly through PHYB/E heterodimers (Hofmann 2009).

301

302 *Transcriptional interaction between PHY genes in dicots and monocots*

303 The classical high irradiance response (HIR) of Arabidopsis is characterized by the suppression of hypocotyl elongation.  
304 Both PHYA and PHYB are involved in this HIR response (Quail, Boylan et al. 1995), but PHYB is mostly responsible for  
305 HIR under cR light (R-HIR) (Nagatani, Kay et al. 1991, Reed, Nagpal et al. 1993) and PHYA predominantly for the HIR  
306 responses under cFR light (FR-HIR) (Hartmann 1967, Nagatani, Reed et al. 1993, Parks and Quail 1993, Whitelam,  
307 Johnson et al. 1993, Casal, Candia et al. 2014, Possart, Fleck et al. 2014). The strong induction of PHYA promoter  
308 activity under FR light may be considered as a novel FR-HIR response. However, not PHYA but PHYE is involved in this  
309 FR-HIR induction of PHYA gene activity (Figs 6, 7). Phytochromes are classified as either Type I, which are activated by  
310 far-red light, or Type II that are activated by red light (Li, Li et al. 2011), although phytochrome Type I and Type II may  
311 also be defined by the phytochrome protein stability in light. For Arabidopsis only PHYA has been classified as a Type I  
312 phytochrome, as it is responsible for many FR light induced responses and is unstable in the light. With the extension  
313 of FR-HIR responses beyond seedling de-etiolation to PHY gene expression under FR, the classification of Arabidopsis  
314 PHYE as type II phytochrome may need reconsideration.

315 Contrary to the five PHY genes in Arabidopsis, rice has only a PHYA, PHYB, and PHYC. Presumably, the PHYA, PHYB and  
316 PHYC were already formed before the formation of gymnosperms, as both monocotyledons and dicotyledons contain  
317 representatives of PHYA, PHYB, and PHYC. In dicotyledonous plants, duplications of the PHYB progenitors resulted in  
318 the PHYE subfamily and, specifically in Arabidopsis, another duplication event of PHYB resulted in PHYD (Clack,  
319 Mathews et al. 1994). In contrast, grasses lack the PHYD and PHYE members of the PHYB subfamily. While the PHYC in  
320 Arabidopsis is a type II phytochrome, in rice, PHYC mediates FR-HIR de-etiolation and therefore could be considered a  
321 Type I phytochrome (Takano, Inagaki et al. 2005). Future research will have to show whether or how the effect of  
322 individual PHY genes in dicots and monocots relates to mutual transcriptional regulation of PHY gene expression and  
323 how this modulates phenotypic responses to different light conditions.

324

325

326 **Acknowledgement:** This research was in part funded by the STW Project (13149) 'Compact Plants'.

## References

- Al-Sady, B., E. A. Kikis, E. Monte and P. H. Quail (2008). "Mechanistic duality of transcription factor function in phytochrome signaling." *Proc Natl Acad Sci U S A* **105**(6): 2232-2237.
- Bae, G. and G. Choi (2008). "Decoding of light signals by plant phytochromes and their interacting proteins." *Annu Rev Plant Biol* **59**: 281-311.
- Balasubramanian, S., S. Sureshkumar, M. Agrawal, T. P. Michael, C. Wessinger, J. N. Maloof, R. Clark, N. Warthmann, J. Chory and D. Weigel (2006). "The PHYTOCHROME C photoreceptor gene mediates natural variation in flowering and growth responses of *Arabidopsis thaliana*." *Nat Genet* **38**(6): 711-715.
- Casal, J. J., A. N. Candia and R. Sellaro (2014). "Light perception and signalling by phytochrome A." *J Exp Bot* **65**(11): 2835-2845.
- Castillon, A., H. Shen and E. Huq (2007). "Phytochrome Interacting Factors: central players in phytochrome-mediated light signaling networks." *Trends Plant Sci* **12**(11): 514-521.
- Chen, J., K. Sonobe, N. Ogawa, S. Masuda, A. Nagatani, Y. Kobayashi and H. Ohta (2013). "Inhibition of arabidopsis hypocotyl elongation by jasmonates is enhanced under red light in phytochrome B dependent manner." *J Plant Res* **126**(1): 161-168.
- Christians, M. J., D. J. Gingerich, Z. Hua, T. D. Lauer and R. D. Vierstra (2012). "The light-response BTB1 and BTB2 proteins assemble nuclear ubiquitin ligases that modify phytochrome B and D signaling in *Arabidopsis*." *Plant Physiol* **160**(1): 118-134.
- Clack, T., S. Mathews and R. A. Sharrock (1994). "The phytochrome apoprotein family in *Arabidopsis* is encoded by five genes: the sequences and expression of PHYD and PHYE." *Plant Mol Biol* **25**(3): 413-427.
- Clack, T., A. Shokry, M. Moffet, P. Liu, M. Faul and R. A. Sharrock (2009). "Obligat heterodimerization of *Arabidopsis* phytochromes C and E and interaction with the PIF3 basic helix-loop-helix transcription factor." *Plant Cell* **21**(3): 786-799.
- de Ruijter, N. C. A., J. Verhees, W. van Leeuwen and A. R. van der Krol (2003). "Evaluation and Comparison of the GUS, LUC and GFP Reporter System for Gene Expression Studies in Plants." *Plant Biology* **5**(2): 103-115.
- Fankhauser, C. (2001). "The phytochromes, a family of red/far-red absorbing photoreceptors." *J Biol Chem* **276**(15): 11453-11456.
- Foreman, J., H. Johansson, P. Hornitschek, E. M. Josse, C. Fankhauser and K. J. Halliday (2011). "Light receptor action is critical for maintaining plant biomass at warm ambient temperatures." *Plant J* **65**(3): 441-452.
- Genoud, T., F. Schweizer, A. Tscheuschler, D. Debrieux, J. J. Casal, E. Schafer, A. Hiltbrunner and C. Fankhauser (2008). "FHY1 mediates nuclear import of the light-activated phytochrome A photoreceptor." *PLoS Genet* **4**(8): e1000143.
- Hartmann, K. M. (1967). "Phytochrome 730 (Pfr), the effector of the "high energy photomorphogenic reaction" in the far-red region." *Naturwissenschaften* **54**(20): 544.
- Hennig, L., M. Funk, G. C. Whitelam and E. Schafer (1999). "Functional interaction of cryptochrome 1 and phytochrome D." *Plant J* **20**(3): 289-294.
- Hofmann, N. R. (2009). "Opposites attract: some phytochromes do not form homodimers." *Plant Cell* **21**(3): 698.
- Huq, E., B. Al-Sady, M. Hudson, C. Kim, K. Apel and P. H. Quail (2004). "Phytochrome-interacting factor 1 is a critical bHLH regulator of chlorophyll biosynthesis." *Science* **305**(5692): 1937-1941.
- Jang, I. C., R. Henriques, H. S. Seo, A. Nagatani and N. H. Chua (2010). "Arabidopsis PHYTOCHROME INTERACTING FACTOR proteins promote phytochrome B polyubiquitination by COP1 E3 ligase in the nucleus." *Plant Cell* **22**(7): 2370-2383.
- Kevei, E., E. Schafer and F. Nagy (2007). "Light-regulated nucleo-cytoplasmic partitioning of phytochromes." *J Exp Bot* **58**(12): 3113-3124.

- Khanna, R., Y. Shen, C. M. Marion, A. Tsuchisaka, A. Theologis, E. Schafer and P. H. Quail (2007). "The basic helix-loop-helix transcription factor PIF5 acts on ethylene biosynthesis and phytochrome signaling by distinct mechanisms." *Plant Cell* **19**(12): 3915-3929.
- Klose, C., A. Viczian, S. Kircher, E. Schafer and F. Nagy (2015). "Molecular mechanisms for mediating light-dependent nucleo/cytoplasmic partitioning of phytochrome photoreceptors." *New Phytol* **206**(3): 965-971.
- Leivar, P., E. Monte, Y. Oka, T. Liu, C. Carle, A. Castillon, E. Huq and P. H. Quail (2008). "Multiple phytochrome-interacting bHLH transcription factors repress premature seedling photomorphogenesis in darkness." *Curr Biol* **18**(23): 1815-1823.
- Leivar, P. and P. H. Quail (2011). "PIFs: pivotal components in a cellular signaling hub." *Trends Plant Sci* **16**(1): 19-28.
- Li, J., G. Li, H. Wang and X. Wang Deng (2011). "Phytochrome Signaling Mechanisms." *The Arabidopsis Book / American Society of Plant Biologists* **9**: e0148.
- Lorrain, S., T. Allen, P. D. Duek, G. C. Whitelam and C. Fankhauser (2008). "Phytochrome-mediated inhibition of shade avoidance involves degradation of growth-promoting bHLH transcription factors." *Plant J* **53**(2): 312-323.
- Millar, A. J., S. R. Short, N. H. Chua and S. A. Kay (1992). "A novel circadian phenotype based on firefly luciferase expression in transgenic plants." *Plant Cell* **4**(9): 1075-1087.
- Monte, E., J. M. Tepperman, B. Al-Sady, K. A. Kaczorowski, J. M. Alonso, J. R. Ecker, X. Li, Y. Zhang and P. H. Quail (2004). "The phytochrome-interacting transcription factor, PIF3, acts early, selectively, and positively in light-induced chloroplast development." *Proc Natl Acad Sci U S A* **101**(46): 16091-16098.
- Nagatani, A. (2004). "Light-regulated nuclear localization of phytochromes." *Curr Opin Plant Biol* **7**(6): 708-711.
- Nagatani, A., S. A. Kay, M. Deak, N. H. Chua and M. Furuya (1991). "Rice type I phytochrome regulates hypocotyl elongation in transgenic tobacco seedlings." *Proc Natl Acad Sci U S A* **88**(12): 5207-5211.
- Nagatani, A., J. W. Reed and J. Chory (1993). "Isolation and Initial Characterization of Arabidopsis Mutants That Are Deficient in Phytochrome A." *Plant Physiol* **102**(1): 269-277.
- Nagy, F. and E. Schafer (2002). "Phytochromes control photomorphogenesis by differentially regulated, interacting signaling pathways in higher plants." *Annu Rev Plant Biol* **53**: 329-355.
- Ni, W., S. L. Xu, R. J. Chalkley, T. N. Pham, S. Guan, D. A. Maltby, A. L. Burlingame, Z. Y. Wang and P. H. Quail (2013). "Multisite light-induced phosphorylation of the transcription factor PIF3 is necessary for both its rapid degradation and concomitant negative feedback modulation of photoreceptor phyB levels in Arabidopsis." *Plant Cell* **25**(7): 2679-2698.
- Paik, I., S. Yang and G. Choi (2012). "Phytochrome regulates translation of mRNA in the cytosol." *Proc Natl Acad Sci U S A* **109**(4): 1335-1340.
- Park, E., J. Park, J. Kim, A. Nagatani, J. C. Lagarias and G. Choi (2012). "Phytochrome B inhibits binding of phytochrome-interacting factors to their target promoters." *Plant J* **72**(4): 537-546.
- Parks, B. M. and P. H. Quail (1993). "hy8, a new class of arabidopsis long hypocotyl mutants deficient in functional phytochrome A." *Plant Cell* **5**(1): 39-48.
- Possart, A., C. Fleck and A. Hiltbrunner (2014). "Shedding (far-red) light on phytochrome mechanisms and responses in land plants." *Plant Sci* **217-218**: 36-46.
- Quail, P. H., M. T. Boylan, B. M. Parks, T. W. Short, Y. Xu and D. Wagner (1995). "Phytochromes: photosensory perception and signal transduction." *Science* **268**(5211): 675-680.
- Reed, J. W., P. Nagpal, D. S. Poole, M. Furuya and J. Chory (1993). "Mutations in the gene for the red/far-red light receptor phytochrome B alter cell elongation and physiological responses throughout Arabidopsis development." *The Plant Cell* **5**(2): 147-157.
- Reed, J. W., P. Nagpal, D. S. Poole, M. Furuya and J. Chory (1993). "Mutations in the gene for the red/far-red light receptor phytochrome B alter cell elongation and physiological responses throughout Arabidopsis development." *Plant Cell* **5**(2): 147-157.
- Salter, M. G., K. A. Franklin and G. C. Whitelam (2003). "Gating of the rapid shade-avoidance response by the circadian clock in plants." *Nature* **426**(6967): 680-683.
- Sanchez-Lamas, M., C. D. Lorenzo and P. D. Cerdan (2016). "Bottom-up Assembly of the Phytochrome Network." *PLoS Genet* **12**(11): e1006413.



- Seaton, D. D., G. Toledo-Ortiz, A. Ganpudi, A. Kubota, T. Imaizumi and K. J. Halliday (2018). "Dawn and photoperiod sensing by phytochrome A." *Proceedings of the National Academy of Sciences* **115**(41): 10523.
- Shapulatov, U., M. van Hoogdalem, M. Schreuder, H. Bouwmeester, I. Y. Abdurakhmonov and A. R. van der Krol (2018). "Functional intron-derived miRNAs and host-gene expression in plants." *Plant Methods* **14**(1): 83.
- Sharrock, R. A. and T. Clack (2004). "Heterodimerization of type II phytochromes in Arabidopsis." *Proc Natl Acad Sci U S A* **101**(31): 11500-11505.
- Somers, D. E., P. F. Devlin and S. A. Kay (1998). "Phytochromes and cryptochromes in the entrainment of the Arabidopsis circadian clock." *Science* **282**(5393): 1488-1490.
- Takano, M., N. Inagaki, X. Xie, N. Yuzurihara, F. Hihara, T. Ishizuka, M. Yano, M. Nishimura, A. Miyao, H. Hirochika and T. Shinomura (2005). "Distinct and cooperative functions of phytochromes A, B, and C in the control of deetiolation and flowering in rice." *Plant Cell* **17**(12): 3311-3325.
- Toth, R., E. Kevei, A. Hall, A. J. Millar, F. Nagy and L. Kozma-Bognar (2001). "Circadian clock-regulated expression of phytochrome and cryptochrome genes in Arabidopsis." *Plant Physiol* **127**(4): 1607-1616.
- Toufighi, K., S. M. Brady, R. Austin, E. Ly and N. J. Provart (2005). "The Botany Array Resource: e-Northerns, Expression Angling, and promoter analyses." *Plant J* **43**(1): 153-163.
- Van Buskirk, E. K., P. V. Decker and M. Chen (2012). "Photobodies in light signaling." *Plant Physiol* **158**(1): 52-60.
- van Hoogdalem, M., U. Shapulatov, L. Sergeeva, J. Busscher-Lange, M. Schreuder, D. Jamar and A. R. van der Krol (2021). "A temperature regime that disrupts clock-controlled starch mobilization induces transient carbohydrate starvation, resulting in compact growth." *J Exp Bot*.
- Whitelam, G. C., E. Johnson, J. Peng, P. Carol, M. L. Anderson, J. S. Cowl and N. P. Harberd (1993). "Phytochrome A null mutants of Arabidopsis display a wild-type phenotype in white light." *Plant Cell* **5**(7): 757-768.
- Xu, X., I. Paik, L. Zhu and E. Huq (2015). "Illuminating Progress in Phytochrome-Mediated Light Signaling Pathways." *Trends Plant Sci* **20**(10): 641-650.
- Yanovsky, M. J., J. J. Casal and J. P. Luzzi (1997). "The VLF loci, polymorphic between ecotypes Landsberg erecta and Columbia, dissect two branches of phytochrome A signal transduction that correspond to very-low-fluence and high-irradiance responses." *Plant J* **12**(3): 659-667.
- Zhang, X., R. Henriques, S. S. Lin, Q. W. Niu and N. H. Chua (2006). "Agrobacterium-mediated transformation of Arabidopsis thaliana using the floral dip method." *Nat Protoc* **1**(2): 641-646.

## Figure legends

### Fig.1. pPHY:LUC reporter plants.

Relative luciferase activity was captured in 28-day old rosette plants sprayed with 1 mM luciferin-D. LUC activity image capturing was by seven minutes exposure time. pPHYC:LUC shows the highest activity, while pPHYE:LUC is a little above background.

### Fig.2. pPHY:LUC activity at ZT=3hr at different developmental stages

Plants were grown in growth cabinets under fluorescent WL and sprayed with substrate luciferin (1 mM) one day and one hour before imaging. LUC activity was imaged in plants at 7, 14 and 24-26 days post germination at 11 am (ZT=3hr). A: pPHYA:LUC in WT and five phytochrome mutants; B: pPHYB:LUC in WT and five phytochrome mutants; C: pPHYC:LUC in WT and five phytochrome mutants; D: pPHYD:LUC in WT and five phytochrome mutants; E: pPHYE:LUC in WT and five phytochrome mutants (not detectable at 7 days). The relative LUC activity was quantified in ImageJ. Number of replicate plants for each reporter line: N=9 for 7 DAG, N=9 for 14 DAG and N=6 for rosette plants. Error bars represent mean  $\pm$ SE. Error Bars with symbols (\*, \*\*, \*\*\*) indicate a significance to compare WT respective to p-value <0.05; <0.01; <0.001.

### Fig.3. Diurnal expression profile of the pPHY:LUC reporters under diurnal 12R/12D, 12FR/12D and 12B/12D

Plants were grown under 12L/12D and 14 days after germination seedlings were sprayed with 1 mM luciferin. One day later plants were placed in LUMINATOR for adjustment under diurnal R+B+FR for one day. Subsequently plants were exposed to light regimes 12R/12D, followed by 12FR/D and finally 12B/12D. Luciferin (1 mM) solution was sprayed once per day. LUC activity images were obtained every half hour (7 min. exposure) for each full diurnal cycle. The relative LUC activity was quantified in ImageJ and corrected for background signal. Number of replicate seedlings for each reporter line: N=6. Error bars represent mean  $\pm$ SE.

### Fig.4. pPHYB:LUC activity in WT and phytochrome mutants in 14 day old seedlings under FR or B

Seeds of the pPHYB:LUC reporter lines were stratified and germinated in growth cabinets under diurnal fluorescent WL (12L/12D). At 14 days after germination seedlings were sprayed with substrate luciferin (1 mM) and one day later placed in LUMINATOR for adjustment under diurnal R+B+FR for one day. Then plants were exposed to light regimes of 12mixed/12D, 12R/12D, 12FR/D and finally 12B/12D. Luciferin (1 mM) solution was sprayed once per day. LUC activity images were obtained every half hour (7 min. exposure) for each full diurnal cycle. The relative LUC activity is quantified in ImageJ and adjusted for background signal. Number of replicate seedlings for each reporter line: N=16.

Error bars represent mean  $\pm$ SE. All results are shown in Fig. S3. Here only results for pPHYB-LUC in WT and *phy*-mutants under FR and B are shown.

**Fig.5. pPHY:LUC activity in WT rosette plants in response to changing R:FR ratios**

pPHY:LUC in WT plants were grown in growth cabinets under diurnal fluorescent WL (12L/12D) for 25 days. Reporter plants were sprayed with substrate luciferin (1 mM) and one day later placed in LUMINATOR for adjustment under diurnal mixed R+B+FR for one day. Subsequently rosette plants were exposed to R light with increasing levels of FR (in blocks of 3 hours), resulting in R:FR ratios of 8, 1, 0.5 and 0.2. After the following night plants were exposed to the reverse light regime. Luciferin (1 mM) solution was sprayed once per day. LUC activity images were obtained every half hour (7 min. exposure) for each full diurnal cycle. The relative LUC activity was quantified in ImageJ and corrected for background signal. At least 7 replicate rosette plants were used for each reporter line. Error bars represent mean  $\pm$ SE. The vertical line indicates the day to night transition.

**Fig.6. pPHYA:LUC activity in WT and *phyD* and *phyE* mutant in response to changing R:FR ratios**

pPHYA:LUC in WT, *phyD* and *phyE* plants were grown in growth cabinets under diurnal fluorescent WL (12L/12D) for 25 days one day later placed in LUMINATOR for adjustment under diurnal mixed R+B+FR for one day. Subsequently rosette plants were exposed to R light with increasing levels of FR (in blocks of 3 hours), resulting in R:FR ratio's of 8, 1, 0.5 and 0.2. After the following night plants were exposed to the reverse light regime. Every day once at 11AM plants were sprayed with substrate luciferin (1 mM) solution. LUC activity images were obtained every half hour (7 min. exposure) for each full diurnal cycle. The relative LUC activity was quantified in ImageJ and corrected for background signal. Number of replicate seedlings for each reporter line: N=7. Error bars represent mean  $\pm$ SE. A: pPHYA-LUC activity in WT, *phyD*. B: pPHYA-LUC activity in WT and *phyE*. Note that for activity in *phyD* mutant the scale of relative LUC activity was adjusted. Black: PHYA-LUC in WT, grey: PHYA-LUC in *phy* mutant. (Expression of all pPHY-LUC reporter lines in WT and *phy*-mutants under changing R:FR is given in Fig. S4).

**Fig.7. qPCR validation for endogenous PHYA and PHYB expression under FR. Plants were exposed to the same cFr as used in Figure 3. A: Endogenous PHYA mRNA levels in WT, *phyD* and *phyE* mutant backgrounds were quantified. B: Endogenous PHYB mRNA levels in WT and *phyE* mutant background were quantified. Error bars with different letters indicate statistical significance difference at the  $P < 0.01$  level analysed by two-way ANOVA with LSD *post hoc* test.**

Fig.1.

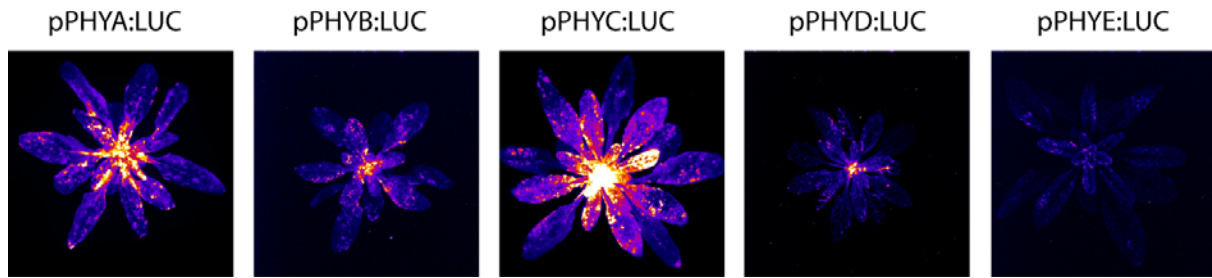

Fig.2.

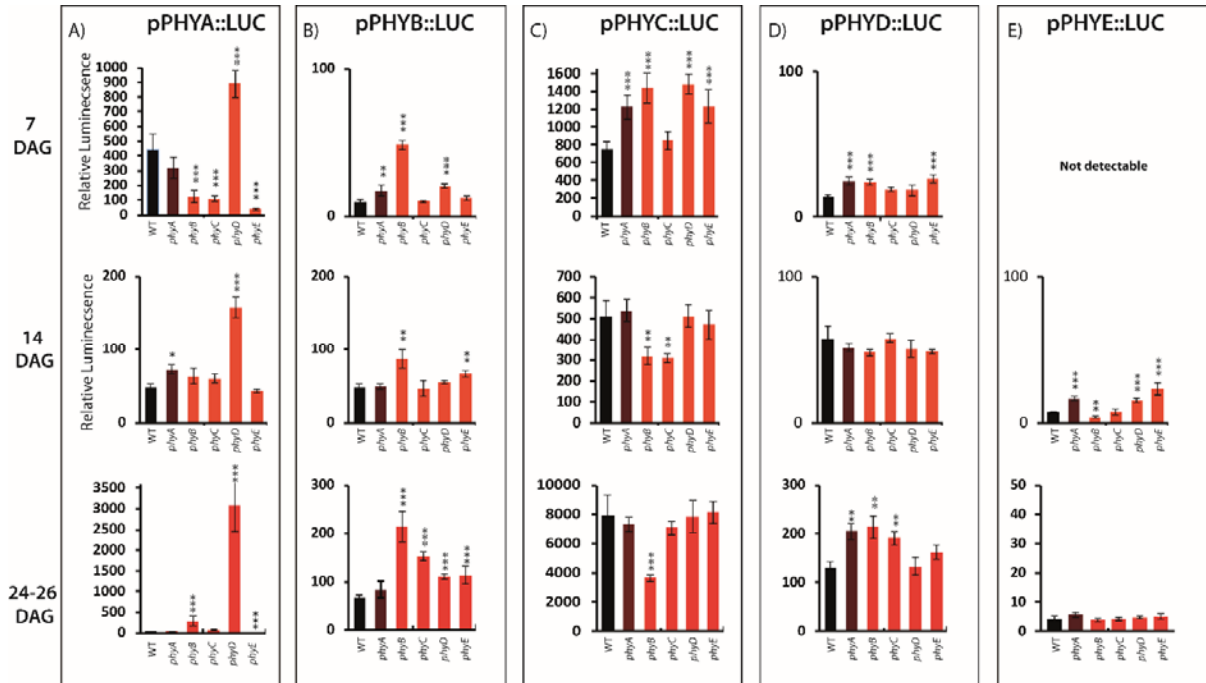

Fig.3.

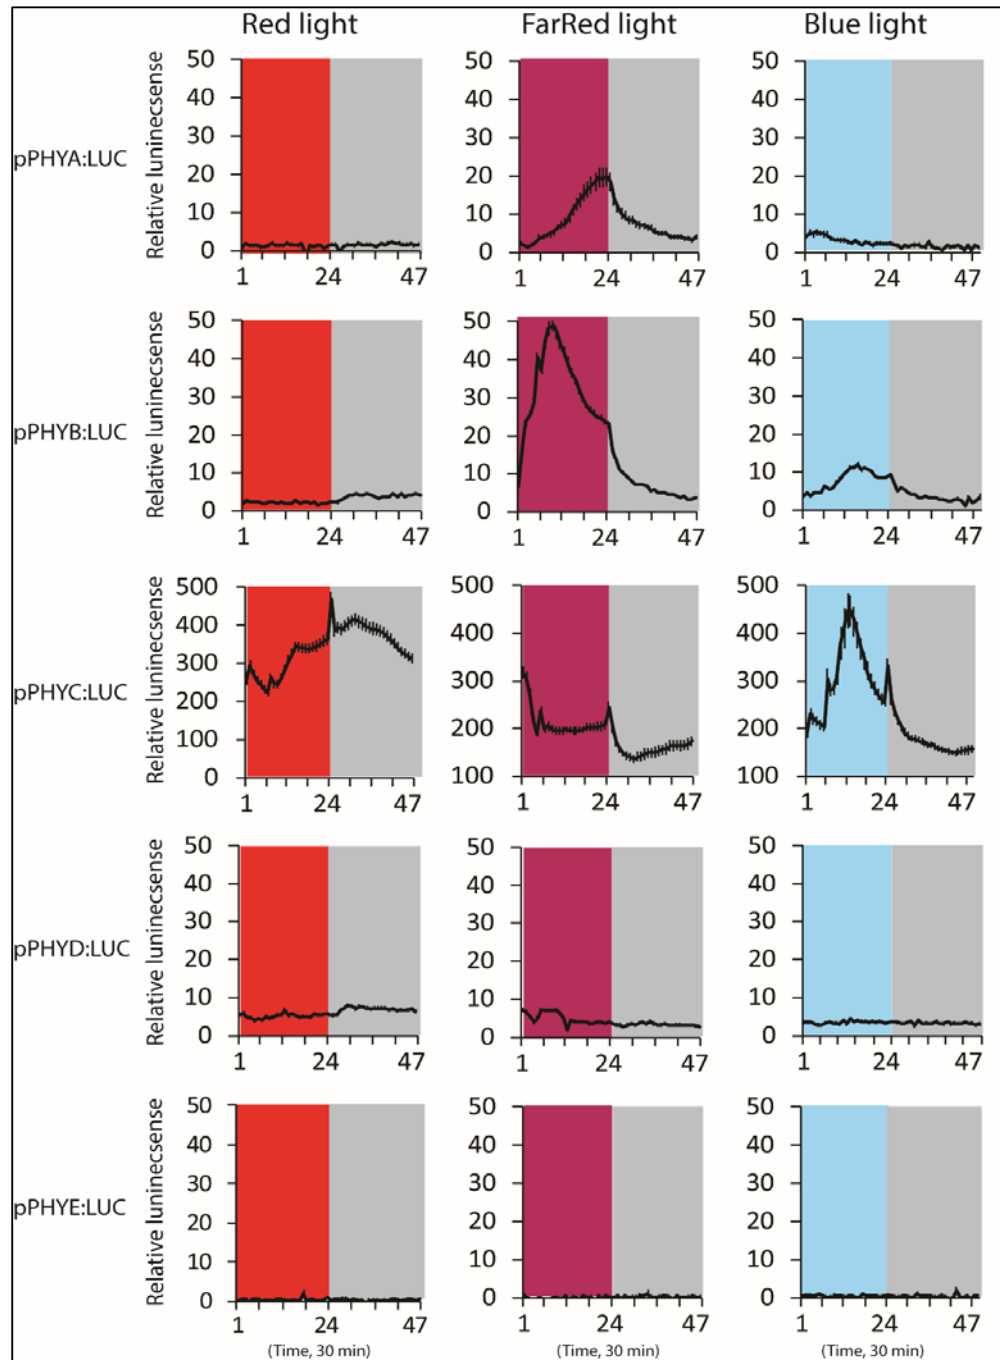

Fig.4.

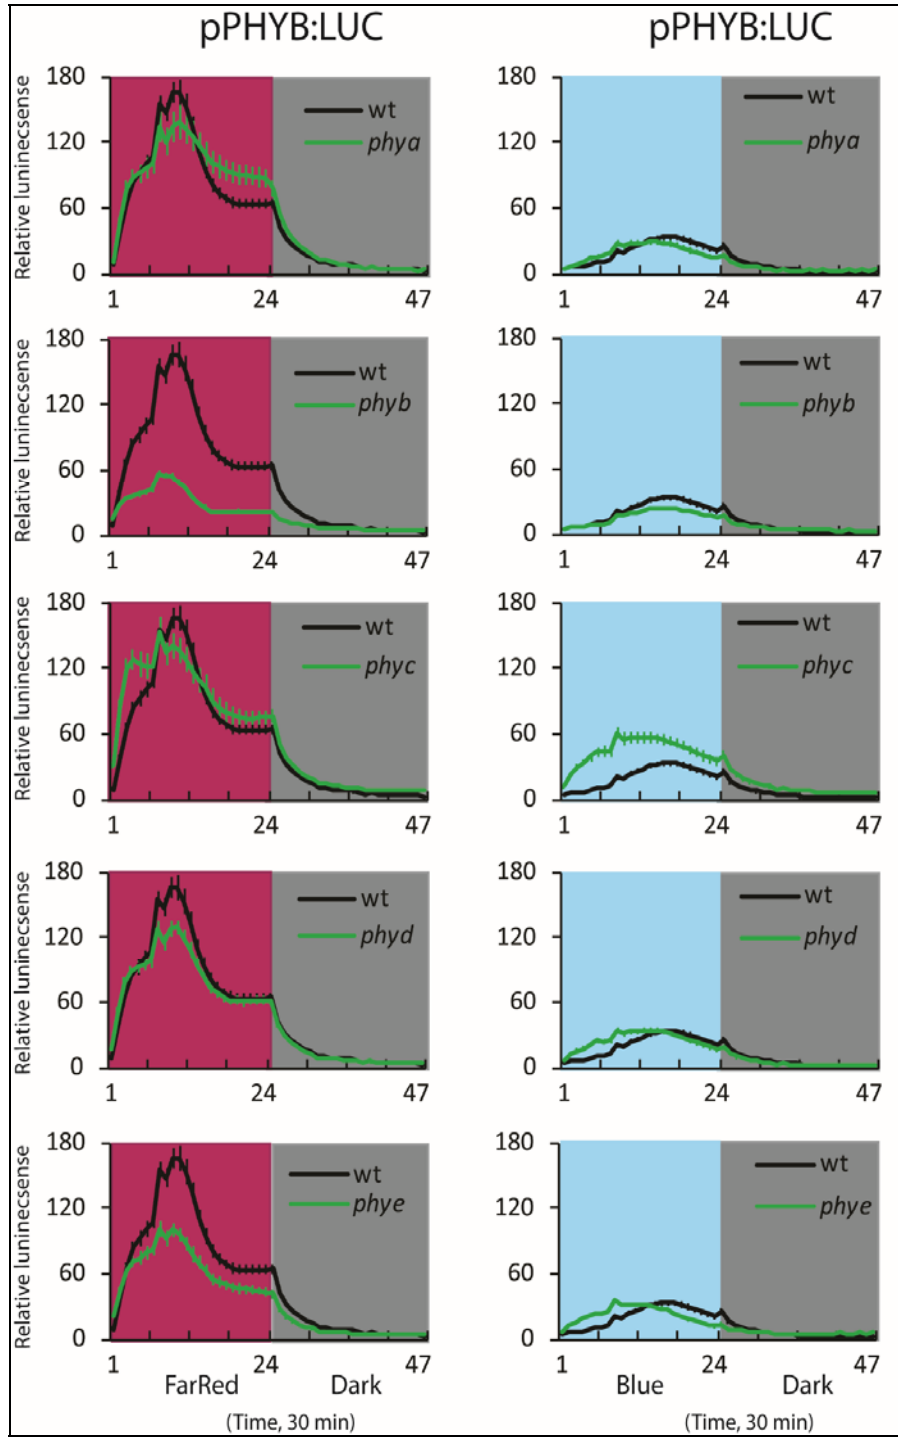

Fig.5.

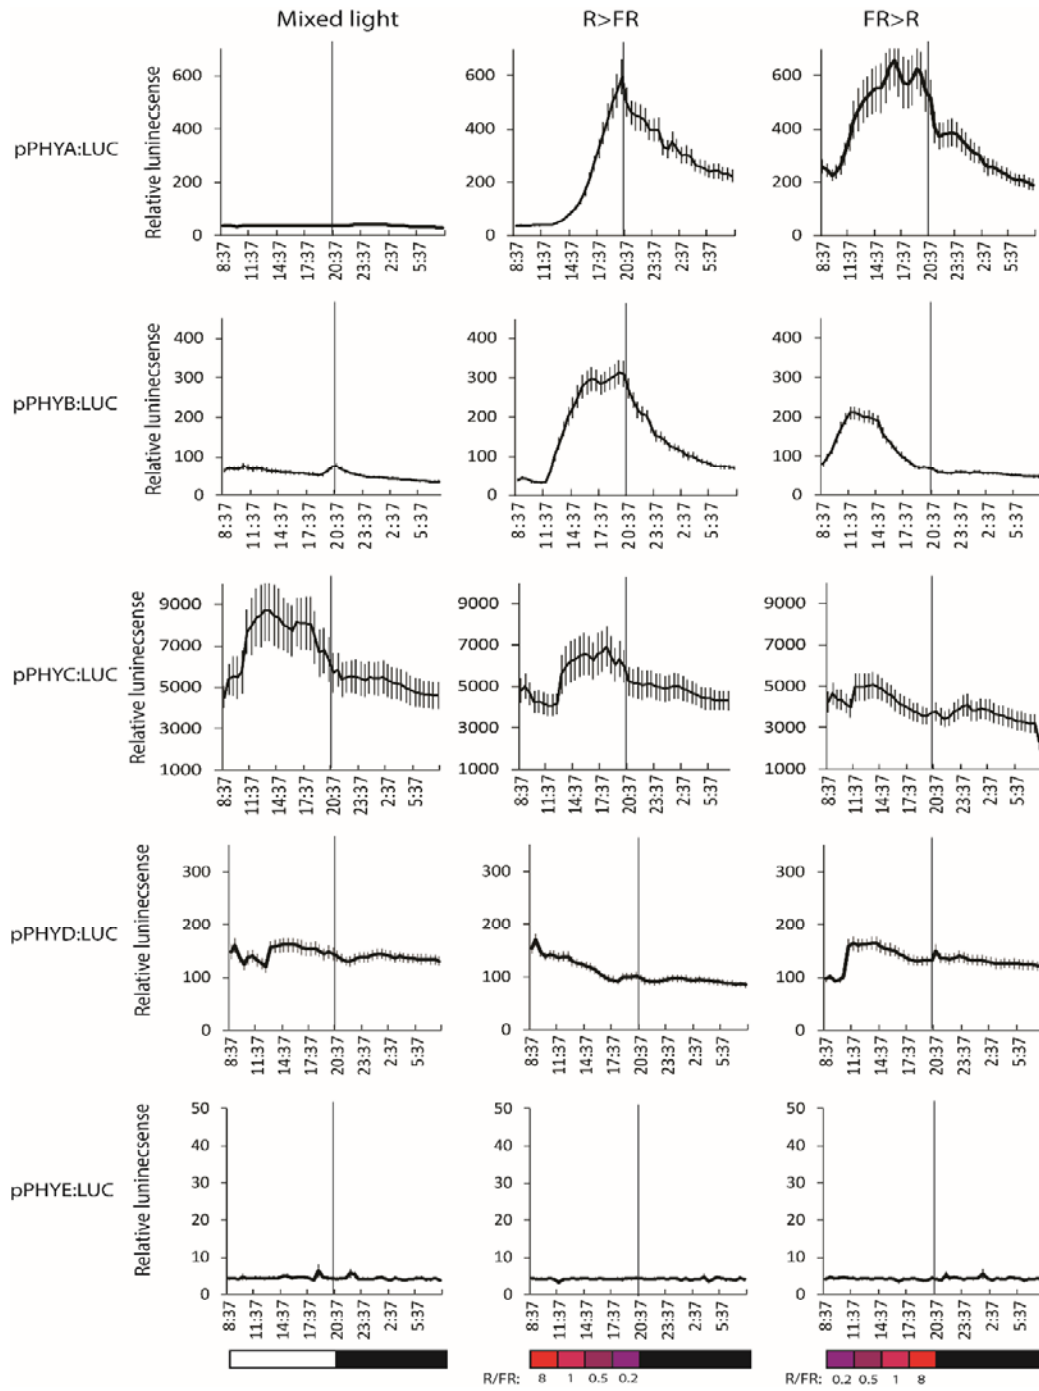



Fig.6.

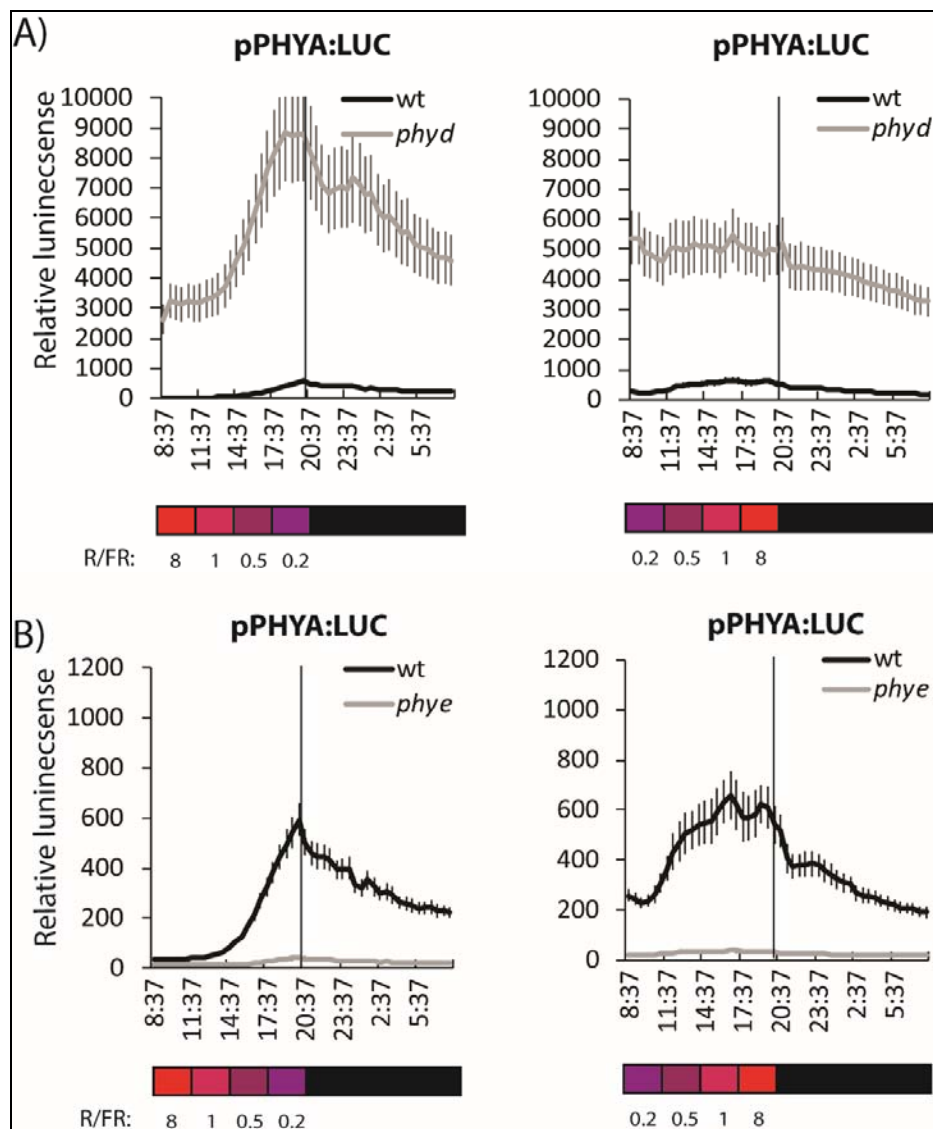

Fig. 7. qPCR validation for mutant lines

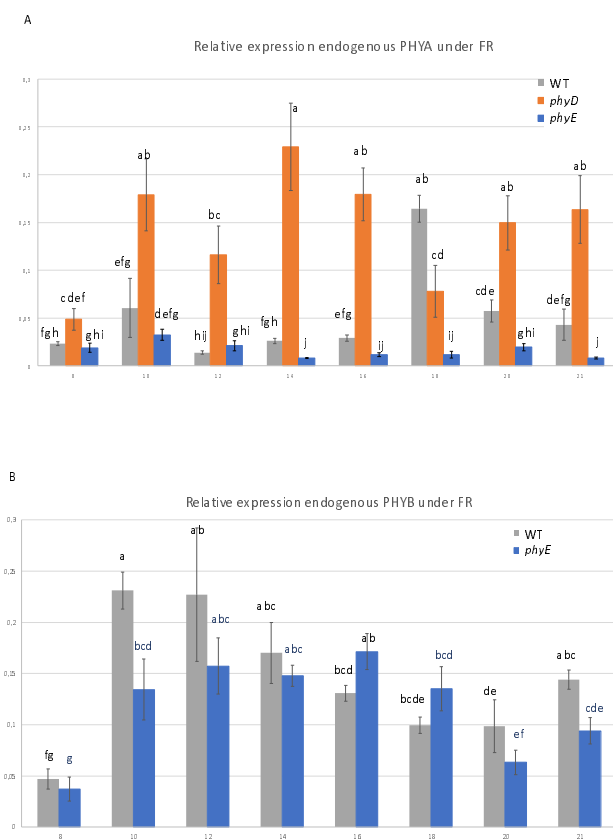

### **Supplemental Figure legends.**

#### **Fig.S1. Diurnal pPHYB:LUC activity in WT and *phy* mutant plants under mixed R+B+FR light**

Seeds of pPHYB-LUC reporter in WT and the five single PHY mutant backgrounds were stratified and germinated in growth cabinets under diurnal fluorescent WL (12L/12D). At 14 days after germination seedlings were sprayed with substrate luciferin (1 mM) and one day later placed in LUMINATOR for adjustment under diurnal R+B+FR for one day. Subsequently plants were exposed to light regimes 12mixed/12D, 12R/12D, followed by 12FR/D and finally 12B/12D. Luciferin (1 mM) solution was sprayed once per day. LUC activity images were obtained every half hour (7 min. exposure) for each full diurnal cycle. The relative LUC activity was quantified in Image J and corrected for background signal. Number of replicate seedlings for each reporter line: N=6. Error bars represent mean  $\pm$ SE.

#### **Fig.S2A-E. pPHY:LUC activity in *phy* mutant compared WT rosette plants in response to changing R:FR ratios**

Plants were grown under diurnal fluorescent WL (12L/12D). At 25 days after germination plants were sprayed with substrate luciferin (1 mM) and one day later placed in LUMINATOR for adjustment under diurnal mixed R+B+FR for one day. Subsequently plants were exposed to a fixed level of R with increasing levels of FR (in blocks of 3 hours), resulting in R:FR ratio's of 8, 1, 0.5 and 0.2. After the following night plants were exposed to the reverse light regime. Luciferin (1 mM) solution was sprayed once per day. LUC activity images were obtained every half hour (7 min. exposure) for each full diurnal cycle. The relative LUC activity was quantified in Image J and corrected for background signal. Number of replicate seedlings for each reporter line: N=6. Error bars represent mean  $\pm$ SE.

A: pPHYA:LUC activity in WT and the five *phy* mutant backgrounds. Note that for the *phyD* mutant background the scale of relative LUC activity is different. B: pPHYB:LUC activity in WT and the five *phy* mutant backgrounds. C: pPHYC:LUC activity in WT and the five *phy* mutant backgrounds. D: pPHYD:LUC activity in WT and the five *phy* mutant backgrounds. E: pPHYE:LUC activity in WT and the five *phy* mutant backgrounds. Note that activity is barely above background.

## Supplemental Figures

Fig. S1

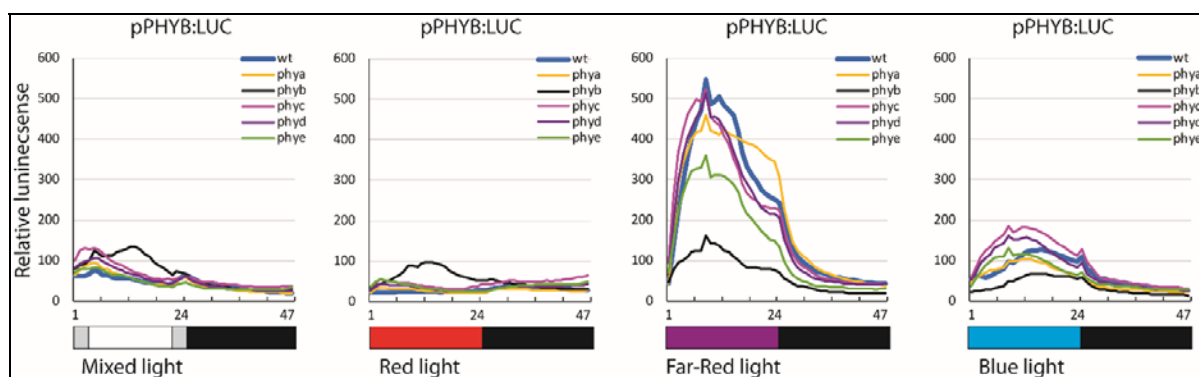

Fig. S2A

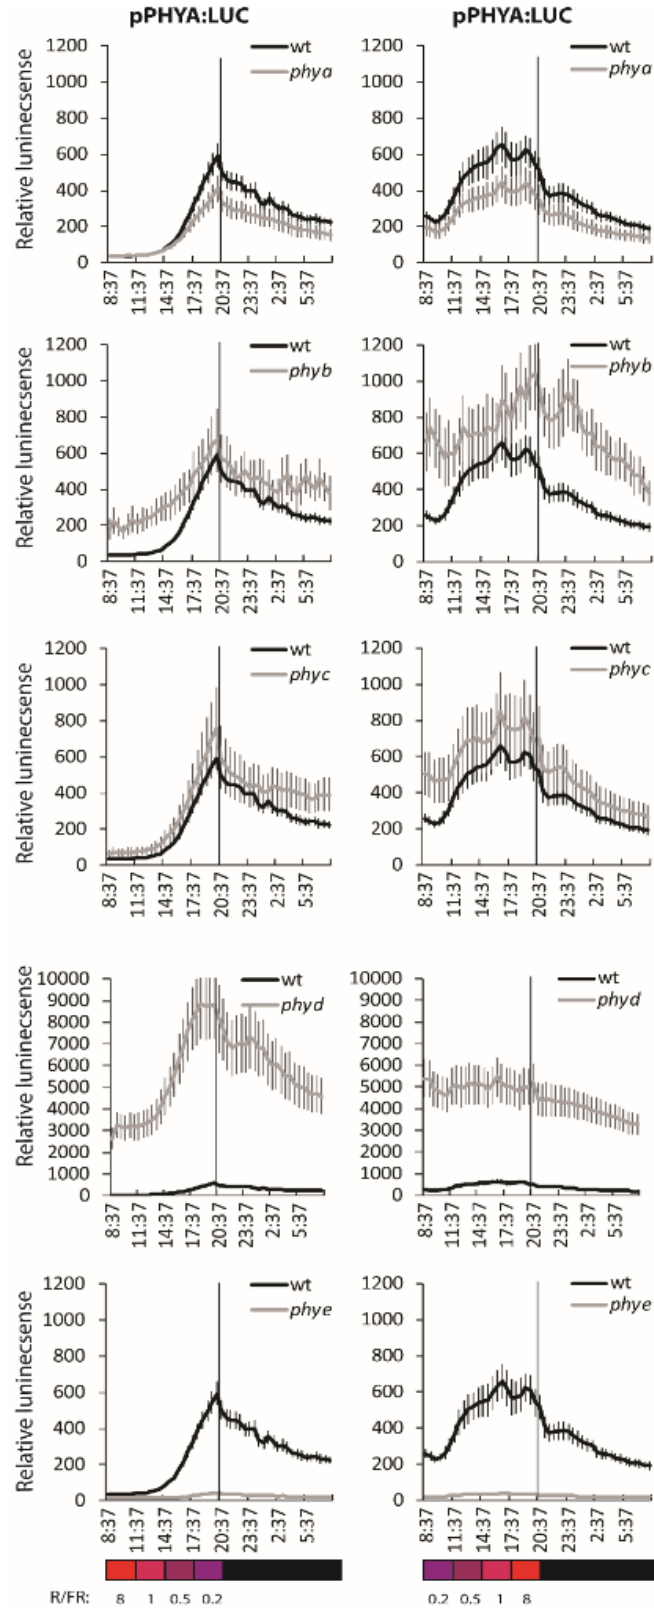

Fig. S2B

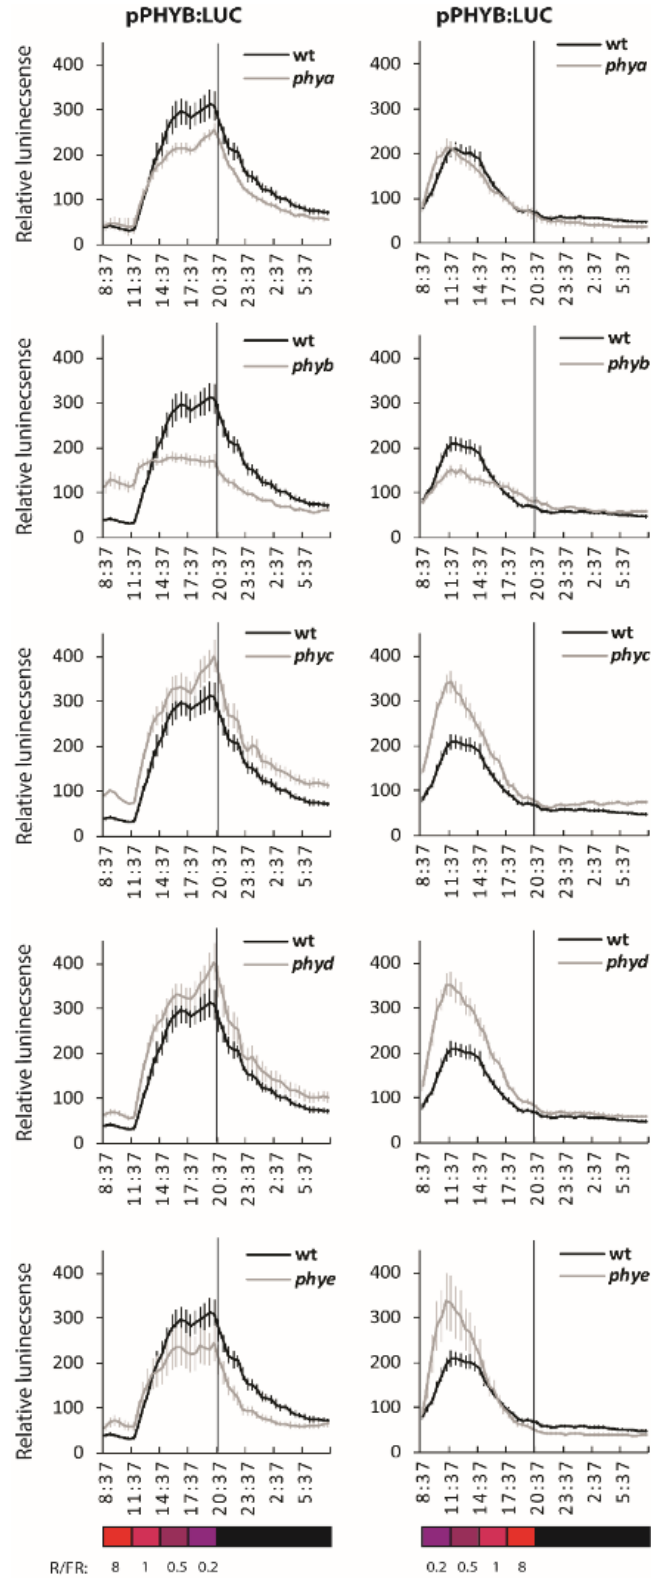

Fig. S2C

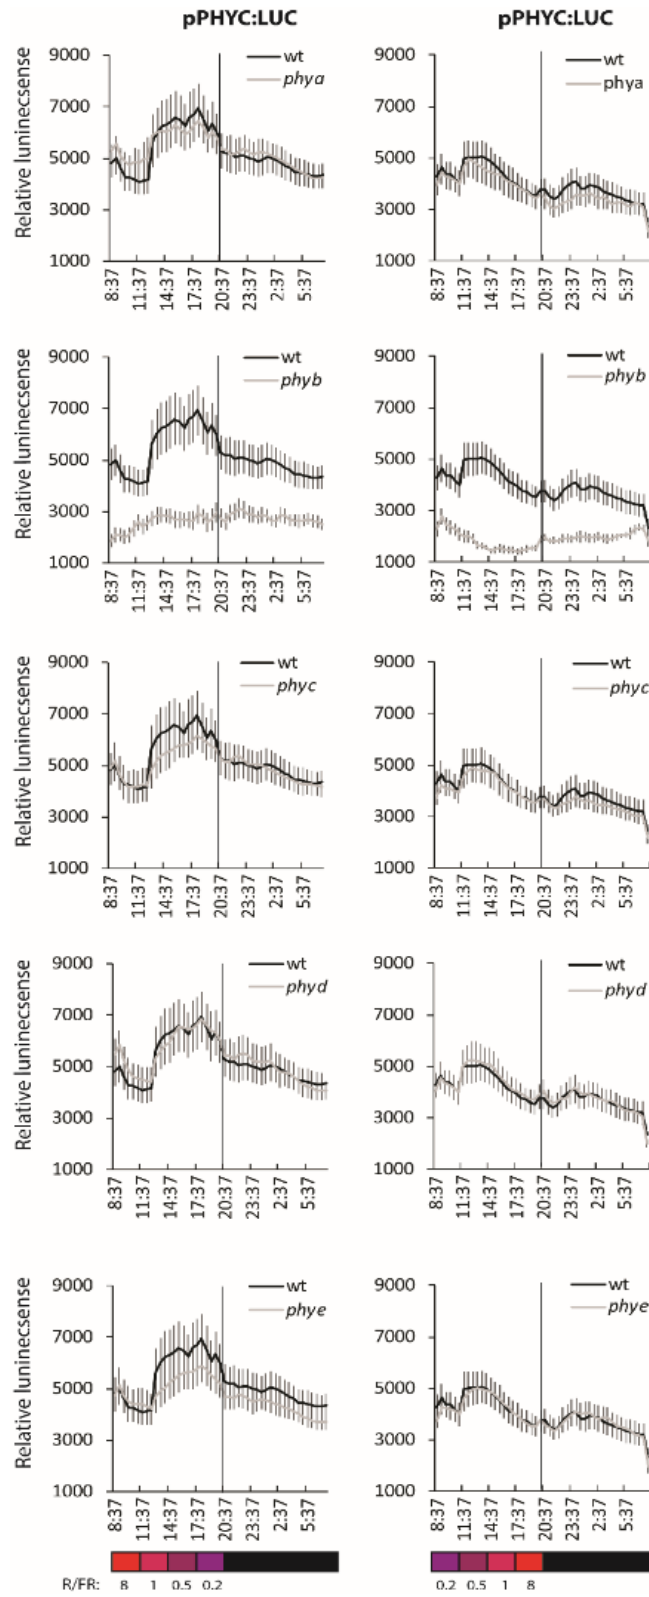

Fig. S2D

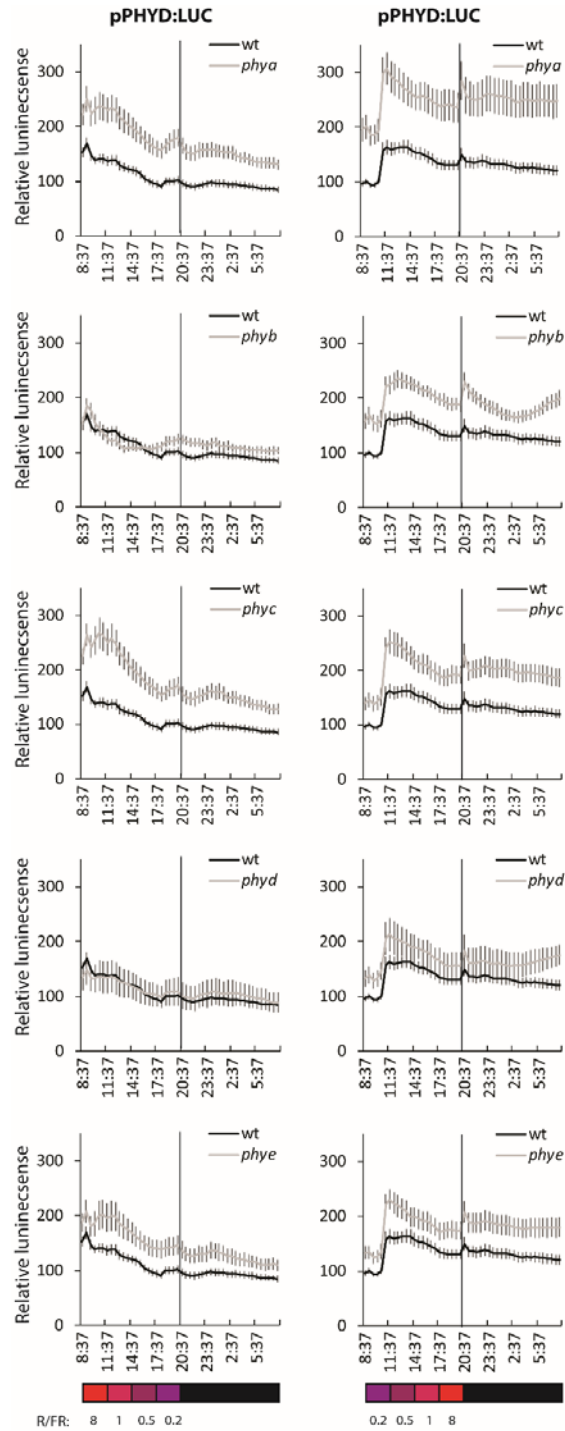



Fig.S2E

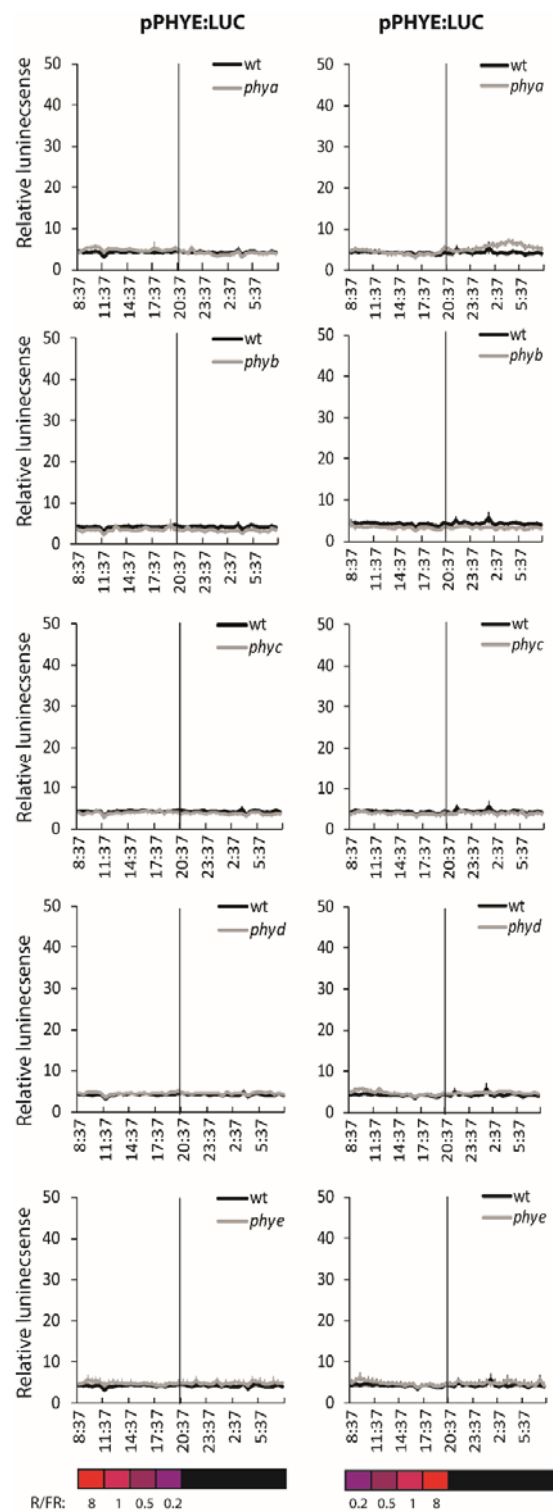

## Supplemental Tables

**Table-S1.** Primers used in this study

| No | Sequence (5'-3')                      | Target              | Description           |
|----|---------------------------------------|---------------------|-----------------------|
| 1  | cagtcagctcagcaattttc -LB              | PHYA<br>(AT1G09570) | Screening for mutant  |
|    | aatgcaaacatgctagggtg -RB              |                     |                       |
| 2  | ttaggcttacgtagcttcccc -LB             | PHYC<br>(AT5G35840) | Screening for mutant  |
|    | gatggagctgagcatagaacg -RB             |                     |                       |
| 3  | gctttttacacgaatcttgcg -LB             | PHYD<br>(AT4G16250) | Screening for mutant  |
|    | agtctcgcgtcga cagtgtac -RB            |                     |                       |
| 4  | aaagaggcggctagtctcagc -LB             | PHYE<br>(AT4G18130) | Screening for mutant  |
|    | tatcagtggttaaaccctcg -RB              |                     |                       |
| 5  | atthccgatttcggaac -LB                 | SALK T-DNA          | Screening for mutant  |
| 6  | tagcatctgaatttcataaccaatctgatacac -LB | SAIL T-DNA          | Screening for mutant  |
| 7  | agagatacgccctggttct -F                | LUC                 | qPCR                  |
|    | ctgttgagcaattcacgttca -R              |                     |                       |
| 8  | tccactgggtattgtgtcg -F                | PHYA                | qPCR                  |
|    | agctatctctgacaggtgga -R               |                     |                       |
| 9  | cgttgggtgtgctcctagt -F                | PHYB                | qPCR                  |
|    | gataccccgcatcgctaaa -R                |                     |                       |
| 10 | tccgccatgaagtgaaggac -F               | PHYC                | qPCR                  |
|    | ccgaattcgctgcaatccag -R               |                     |                       |
| 11 | cgattcctcgtaccagagc -F                | PHYD                | qPCR                  |
|    | tttcccgcattttactg -R                  |                     |                       |
| 12 | attgaaaccgcaactgcacc -F               | PHYE                | qPCR                  |
|    | tcatcgcaagtactccc -R                  |                     |                       |
| 13 | ccatcgacagtctgatcca-F                 | AT2G39960           | Housekeeping for qPCR |
|    | ccattgggtgacacttttggg-R               |                     |                       |

**Table-S2.** List of reporter lines were used in study. The pPHY:LUC reporter was created in Col-0 and its crossed with different mutant background lines.

| LUC reporter lines, constructs | Description                                        | Plasmid notes                 | Ref      |
|--------------------------------|----------------------------------------------------|-------------------------------|----------|
| pPHYA:LUC <sup>WT</sup>        | pPHYA:LUC reporter in Col-0                        | <i>Hyg<sup>R</sup></i> /pPCVH | In study |
| pPHYA:LUC <sup>phyA</sup>      | pPHYA:LUC reporter crossed to <i>phyA</i> mutant   | <i>Hyg<sup>R</sup></i> /pPCVH | In study |
| pPHYA:LUC <sup>phyB-9</sup>    | pPHYA:LUC reporter crossed to <i>phyB-9</i> mutant | <i>Hyg<sup>R</sup></i> /pPCVH | In study |
| pPHYA:LUC <sup>phyC</sup>      | pPHYA:LUC reporter crossed to <i>phyC</i> mutant   | <i>Hyg<sup>R</sup></i> /pPCVH | In study |
| pPHYA:LUC <sup>phyD</sup>      | pPHYA:LUC reporter crossed to <i>phyD</i> mutant   | <i>Hyg<sup>R</sup></i> /pPCVH | In study |
| pPHYA:LUC <sup>phyE</sup>      | pPHYA:LUC reporter crossed to <i>phyE</i> mutant   | <i>Hyg<sup>R</sup></i> /pPCVH | In study |
| pPHYB:LUC <sup>WT</sup>        | pPHYB:LUC reporter in Col-0                        | <i>Hyg<sup>R</sup></i> /pPCVH | In study |
| pPHYB:LUC <sup>phyA</sup>      | pPHYB:LUC reporter crossed to <i>phyA</i> mutant   | <i>Hyg<sup>R</sup></i> /pPCVH | In study |
| pPHYB:LUC <sup>phyB-9</sup>    | pPHYB:LUC reporter crossed to <i>phyB-9</i> mutant | <i>Hyg<sup>R</sup></i> /pPCVH | In study |
| pPHYB:LUC <sup>phyC</sup>      | pPHYB:LUC reporter crossed to <i>phyC</i> mutant   | <i>Hyg<sup>R</sup></i> /pPCVH | In study |
| pPHYB:LUC <sup>phyD</sup>      | pPHYB:LUC reporter crossed to <i>phyD</i> mutant   | <i>Hyg<sup>R</sup></i> /pPCVH | In study |
| pPHYB:LUC <sup>phyE</sup>      | pPHYB:LUC reporter crossed to <i>phyE</i> mutant   | <i>Hyg<sup>R</sup></i> /pPCVH | In study |
| pPHYC:LUC <sup>WT</sup>        | pPHYC:LUC reporter in Col-0                        | <i>Hyg<sup>R</sup></i> /pPCVH | In study |
| pPHYC:LUC <sup>phyA</sup>      | pPHYC:LUC reporter crossed to <i>phyA</i> mutant   | <i>Hyg<sup>R</sup></i> /pPCVH | In study |
| pPHYC:LUC <sup>phyB-9</sup>    | pPHYC:LUC reporter crossed to <i>phyB-9</i> mutant | <i>Hyg<sup>R</sup></i> /pPCVH | In study |
| pPHYC:LUC <sup>phyC</sup>      | pPHYC:LUC reporter crossed to <i>phyC</i> mutant   | <i>Hyg<sup>R</sup></i> /pPCVH | In study |
| pPHYC:LUC <sup>phyD</sup>      | pPHYC:LUC reporter crossed to <i>phyD</i> mutant   | <i>Hyg<sup>R</sup></i> /pPCVH | In study |
| pPHYC:LUC <sup>phyE</sup>      | pPHYC:LUC reporter crossed to <i>phyE</i> mutant   | <i>Hyg<sup>R</sup></i> /pPCVH | In study |
| pPHYD:LUC <sup>WT</sup>        | pPHYD:LUC reporter in Col-0                        | <i>Hyg<sup>R</sup></i> /pPCVH | In study |
| pPHYD:LUC <sup>phyA</sup>      | pPHYD:LUC reporter crossed to <i>phyA</i> mutant   | <i>Hyg<sup>R</sup></i> /pPCVH | In study |
| pPHYD:LUC <sup>phyB-9</sup>    | pPHYD:LUC reporter crossed to <i>phyB-9</i> mutant | <i>Hyg<sup>R</sup></i> /pPCVH | In study |
| pPHYD:LUC <sup>phyC</sup>      | pPHYD:LUC reporter crossed to <i>phyC</i> mutant   | <i>Hyg<sup>R</sup></i> /pPCVH | In study |
| pPHYD:LUC <sup>phyD</sup>      | pPHYD:LUC reporter crossed to <i>phyD</i> mutant   | <i>Hyg<sup>R</sup></i> /pPCVH | In study |
| pPHYD:LUC <sup>phyE</sup>      | pPHYD:LUC reporter crossed to <i>phyE</i> mutant   | <i>Hyg<sup>R</sup></i> /pPCVH | In study |
| pPHYE:LUC <sup>WT</sup>        | pPHYE:LUC reporter in Col-0                        | <i>Hyg<sup>R</sup></i> /pPCVH | In study |
| pPHYE:LUC <sup>phyA</sup>      | pPHYE:LUC reporter crossed to <i>phyA</i> mutant   | <i>Hyg<sup>R</sup></i> /pPCVH | In study |
| pPHYE:LUC <sup>phyB-9</sup>    | pPHYE:LUC reporter crossed to <i>phyB-9</i> mutant | <i>Hyg<sup>R</sup></i> /pPCVH | In study |
| pPHYE:LUC <sup>phyC</sup>      | pPHYE:LUC reporter crossed to <i>phyC</i> mutant   | <i>Hyg<sup>R</sup></i> /pPCVH | In study |
| pPHYE:LUC <sup>phyD</sup>      | pPHYE:LUC reporter crossed to <i>phyD</i> mutant   | <i>Hyg<sup>R</sup></i> /pPCVH | In study |
| pPHYE:LUC <sup>phyE</sup>      | pPHYE:LUC reporter crossed to <i>phyE</i> mutant   | <i>Hyg<sup>R</sup></i> /pPCVH | In study |
